# Supplementary material for: A search for relevant contextual factors in intervention studies: a stepwise approach with online information
Source: HighWire-hosted journal article supplement (doi:10.1136/bmjopen-2021-057048), 2022-09-01

**Supplementary file 1: Map of Flanders (Belgium)**

The three municipalities participating in the D-SCOPE programme are Knokke-Heist, Ghent and Tienen.

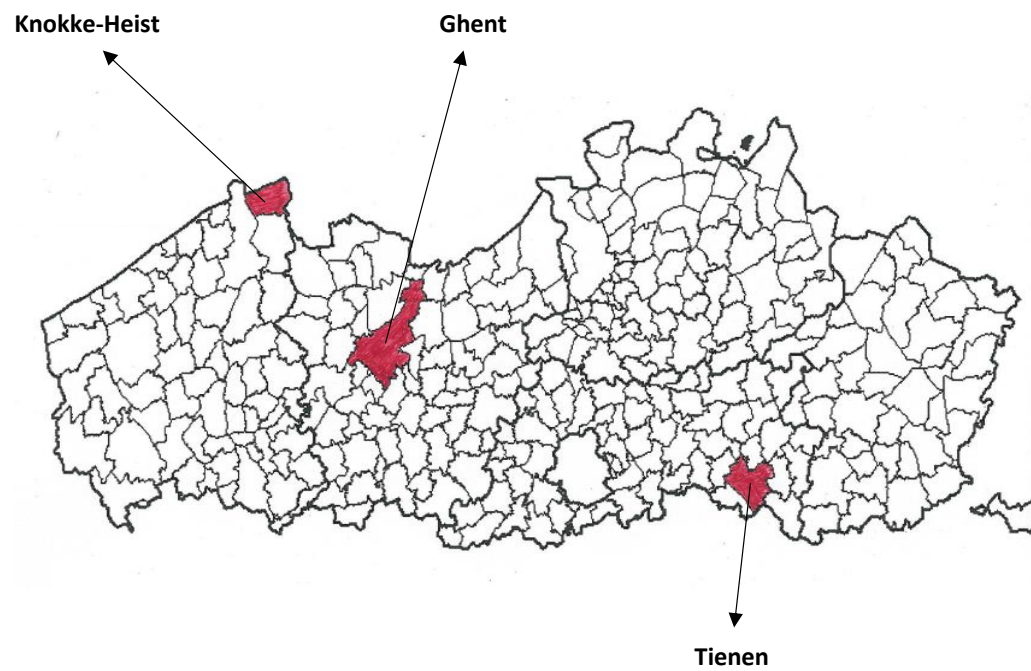

Supplement: bmjopen-2021-057048supp001_data_supplement.pdf [file bmjopen-2021-057048supp001_data_supplement.pdf]
