# Supplementary material for: A search for relevant contextual factors in intervention studies: a stepwise approach with online information
Source: HighWire-hosted journal article supplement (doi:10.1136/bmjopen-2021-057048), 2022-09-01
Supplement: bmjopen-2021-057048supp004_data_supplement.pdf [file bmjopen-2021-057048supp004_data_supplement.pdf]

## Supplementary file 4: Critical selection

| Topic               | Indicator                                                                               | Gent    | Knokke-Heist | Tienen | Respondent 1 | Respondent 2 |
|---------------------|-----------------------------------------------------------------------------------------|---------|--------------|--------|--------------|--------------|
| Socio-demographic   | Total population 2015                                                                   | 253.266 | 33.452       | 33.95  | Green        | Red          |
|                     | Number of people ≥65y and older                                                         | 42.437  | 11.163       | 7.156  |              |              |
|                     | Percentage of people ≥65y 2015                                                          | 16,80%  | 33,40%       | 21,10% |              |              |
|                     | Number of people ≥80y and older                                                         | 13.978  | 3.213        | 2.225  |              |              |
|                     | Percentage of people ≥80y 2015                                                          | 5,50%   | 9,60%        | 6,60%  |              |              |
|                     | Growth rate number of people ≥65+ 2005-2014 (2005=100)                                  | 101,4   | 126,8        | 109,9  |              |              |
|                     | Dependency ratio (65+/20-64jaar) 2015                                                   | 27,03%  | 63,10%       | 36,21% |              |              |
|                     | Population density 2015                                                                 | 1.622   | 593          | 473    |              |              |
| Community resources | Total taks revenu municipality per inhabitant (in euro) (2013)                          | 3.352   | 2.626        | 1.603  | Red          | Red          |
|                     | Total expenditure municipality per inhabitant (in euro) 2013                            | 3.359   | 2.505        | 1.604  |              |              |
|                     | Debt municipality per inhabitant (in euro) 2013                                         | 2.014   | 1.763        | 1.653  |              |              |
|                     | Number of employee municipality per 1000 inhabitants 2013                               | 21      | 13,1         | 11,4   |              |              |
|                     | Total resources of the community social security in euros per inhabitant 2013 (in euro) | 304     | 151          | 229    |              |              |
|                     | Debt community social security in euros per inhabitant 2013                             | 145     | 266          | 548    |              |              |
| Socio-economic      | Employment rate (20-64) 2013                                                            | 67,2    | 68,7         | 71,1   | Red          | Yellow       |
|                     | Average income per inhabitant (in €) 2012                                               | 17.189  | 23.203       | 18.248 |              | Green        |
